# Supplementary material for: KIF18B promotes tumor progression in osteosarcoma by activating β-catenin
Source: PubMed Central journal article supplement (PMC7309474; doi:10.20892/j.issn.2095-3941.2019.0452), 2020-05-15
Supplement: cbm-17-371-s001.pdf [file cbm-17-371-s001.pdf]

## Supplementary materials

**Table S1** Primers of genes for qRT-PCR

| Gene   | Left primer           | Right primer         |
|--------|-----------------------|----------------------|
| KIF18B | TTCACACCATTCTCCTGCCT  | ATAAATGAGAGGGGAGGCCG |
| CTNNB  | CTTACACCCACCATCCCACT  | CCTCCACAAATTGCTGCTGT |
| WNT5A  | CGTTAGCAGCATCAGTCCAC  | ACGGCATCTCTTTTACCA   |
| MYC    | CTTCTCCTCCACTCTCCCTGG | AACCCTCTCCCTTTCTCTGC |
| CCND1  | TTTGTGTGTGTGCAGGGAG   | TTTCTTCTTGACTGGCACGC |
| ATF2   | AGTACAAGTGGTCGTCGGAG  | TGACTTCACTCTGCAGCTGA |
| CUX1   | CTGACCACCTGCACAAGTTC  | CAGCGGATAAGGGCAGTTTC |
| TCF3   | GATGCTGCCTTTGGTCTCTG  | CTCAGGTTTACACGGGGTCT |
| RUNX1  | CCAGCAGAGGGGAGAAGAAA  | ATGAAGCACTGTGGGTACGA |
| GATA1  | TCTACCCTGCCTCAACTGTG  | GAGTGATGAAGGCAGTGCAG |
| ACTB   | CCCTGGAGAAGAGCTACGAG  | CGTACAGGTCTTTGCGGATG |

**Table S2** Primers of CTNNB1 for the ChIP experiment (Figure 5B)

| Primer   | Left primer            | Right primer           |
|----------|------------------------|------------------------|
| Primer-1 | GGAATCAGTACCTGAAAACGCC | CCGTCTGTCACCATAGCACA   |
| Primer-2 | TCCGCCTGCATCTATGTGT    | GCAGCAAATTGACGTTTGTGCG |
| Primer-3 | ACAGCGCTCTGGAGCTAATC   | ATGGTGGATCCCACCTCTCA   |
| Primer-4 | AGGATAACCAGGGCCACCTT   | TATAAGTCGCGCAGAAGCCG   |

**Table S3** Top 15 genes downregulated in the shKIF18B group

| Entrez | Gene symbol | log FC | P           |
|--------|-------------|--------|-------------|
| 9315   | NREP        | -2.896 | 3.08652E-20 |
| 23234  | DNAJC9      | -2.683 | 2.99457E-20 |
| 10592  | SMC2        | -2.355 | 5.61178E-18 |
| 55026  | TMEM255A    | -2.245 | 6.16853E-13 |
| 57007  | ACKR3       | -2.181 | 7.06502E-15 |
| 692149 | SCARNA14    | -2.141 | 1.88317E-14 |
| 1499   | CTNNB1      | -2.080 | 1.18089E-15 |
| 26047  | CNTNAP2     | -2.008 | 6.80892E-16 |
| 55214  | P3H2        | -1.983 | 4.194E-13   |
| 25928  | SOSTDC1     | -1.956 | 1.36719E-15 |
| 4023   | LPL         | -1.950 | 2.88914E-15 |
| 81611  | ANP32E      | -1.946 | 9.50442E-22 |
| 54510  | PCDH18      | -1.925 | 1.21919E-14 |
| 23767  | FLRT3       | -1.884 | 1.26295E-12 |
| 7474   | WNT5A       | -1.862 | 1.12552E-21 |

**CTNNB1 promoter**

>FP005181 CTNNB1\_1 :+U EU:NC; range -2000 to 100.

.....ACTTATATAGTAAATATCTTTAAGACAAAAATAAAAGTTATTTAAAGAATA  
 CGCTGGCCCTGAAACATGAGCTGTGCCTTAACTACATATCCTACCTCCATGAG  
 TGAATGAATAAGTGGTTTTCCGCCTGCATCTATGTGTTAAGACCTATTGTTTGC  
 TTGTATTAATTGTAGTCTGGGATAAAAGCACAGAGGTAACCTTCACTGCTGCT  
 TTTTGTACTCTCTCAATGTTTTGGAGGAAAAATAAGCACAAACAATAGCCTAG  
 AGAAACTGAATCGATCATACTTGTGCAGCTTCGACAAACGTCAAATTTTGCTGC  
 ATTAGAATGGGAAACATTTTTTCAGTCTATTGAAATGAATTACAAACGTTTTTAA  
 ATAGAAAATTAGTTAAAAAATTGGAGGCTGCTTAATCGATAGCTTTCTCTATAA  
 ACATACTTGGATTTACAAATAAGTAATACCGTAAAAATCTTCTCTCCAAAGA  
 AAAATCCCCACAAATAAATCTATTGATACCTAGTGACAAG.....

MUT  
 GTTTCAGTT

**Figure S1** Substitution of the potential binding site of ATF2 at the promoter region of  $\beta$ -catenin with a mutant fragment.

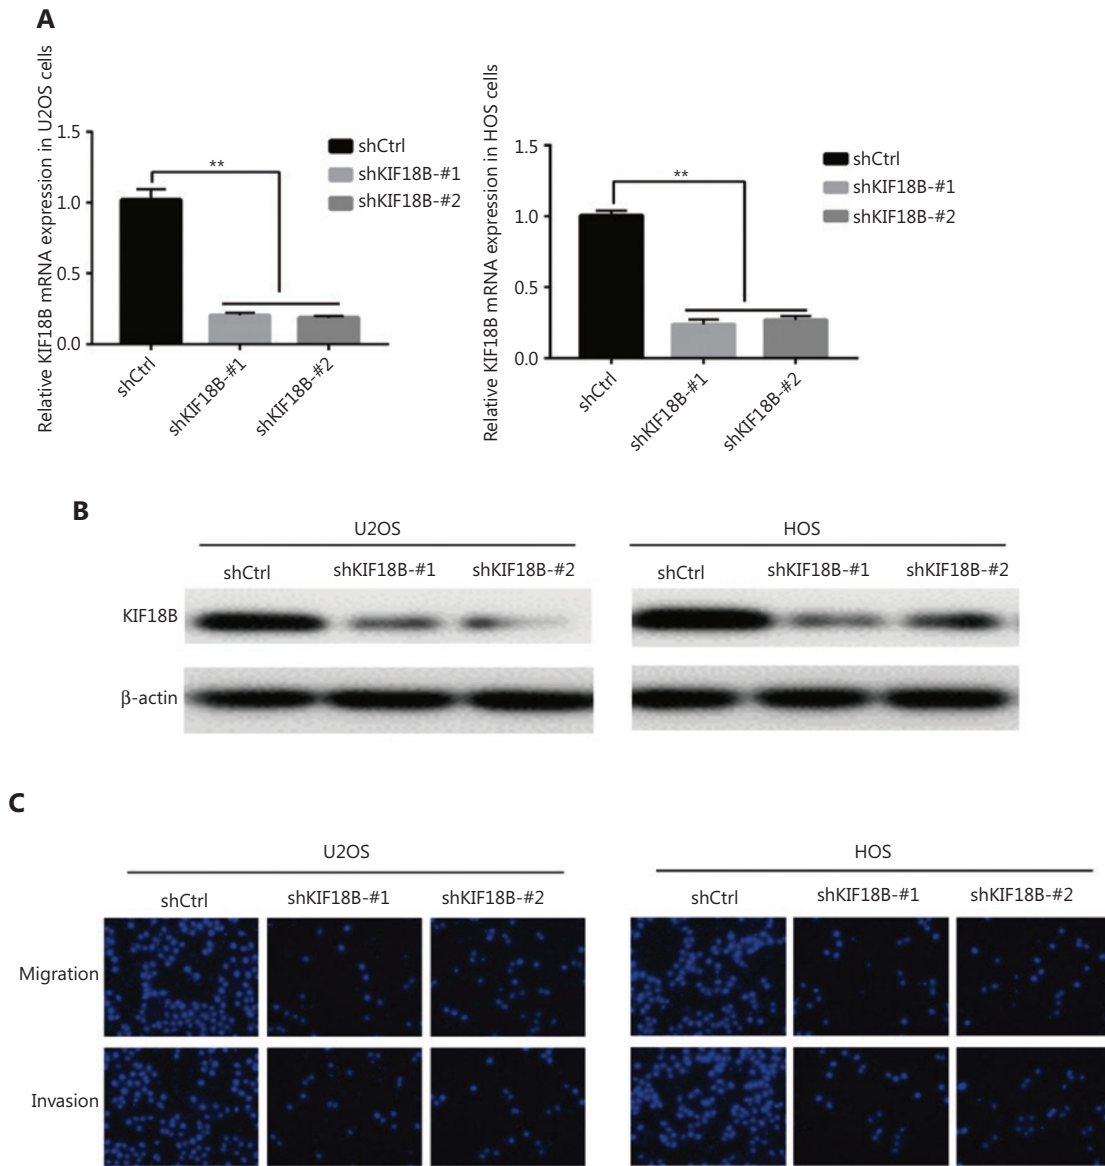

**Figure S2** Knockdown of KIF18B affects migration and invasion of U2OS and HOS cell lines. mRNA (A) and protein (B) expression of KIF18B in U2OS and HOS cells. KIF18B mRNA and protein levels were significantly downregulated in all shKIF18B-transfected cell lines. (C) Transwell assays of shCtrl and shKIF18B cell lines. Knockdown of KIF18B impaired both cell migration and invasion abilities.
